# Supplementary material for: A dual-band photodetector based on a mixed-dimensional WSe2/GaN junction
Source: Royal Society of Chemistry journal article supplement (doi:10.1039/d4tc00215f), 2024-01-01
Supplement: d4tc00215f1.pdf [file d4tc00215f1.pdf]

# Supporting Information

## Dual-band photodetector based on mixed-dimensional WSe<sub>2</sub>/GaN junction

Shuting Chen<sup>1</sup>, Hui Wang<sup>1</sup>, Yuqing Yang<sup>1,2</sup>, Shishi Liu<sup>1</sup>, Lingyu Zhu<sup>1</sup>, Xingfu Wang<sup>1,3\*</sup>, Nengjie Huo<sup>1,3\*</sup>

<sup>1</sup>School of Semiconductor Science and Technology, South China Normal University, Foshan 528225, P.R. China

<sup>2</sup>School of Optoelectronic Science and Engineering, University of Electronic Science and Technology of China, Chengdu 610054, P.R. China

<sup>3</sup>Guangdong Provincial Key Laboratory of Chip and Integration Technology, Guangzhou 510631, P.R. China

### \*Corresponding authors:

Nengjie Huo, Email: njhuo@m.scnu.edu.cn

Xingfu Wang, Email: xfwang@m.scnu.edu.cn

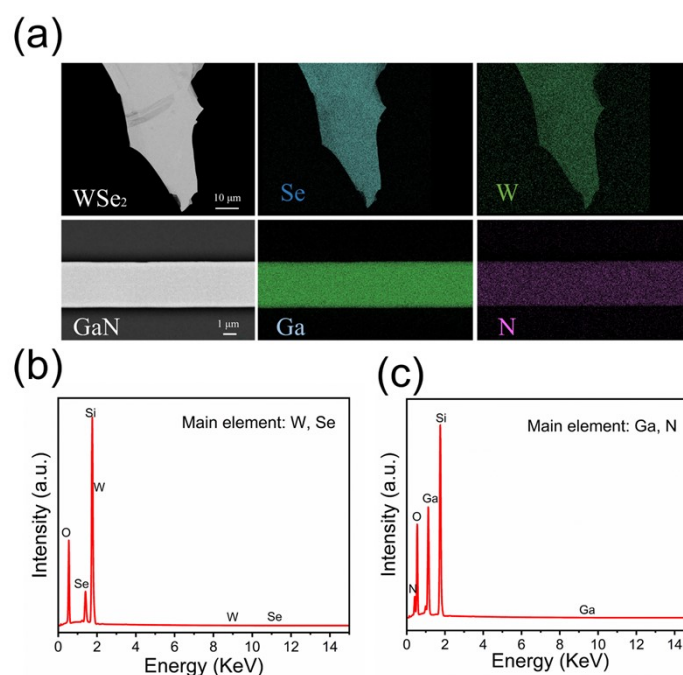

Fig. S1. (a) SEM image of WSe<sub>2</sub> nanosheet and GaN microwires, and corresponding EDS element mapping of Se, W, Ga and N atoms, respectively. (b) The corresponding EDS spectrum of WSe<sub>2</sub> nanosheet. (c) The corresponding EDS spectrum of GaN microwire.

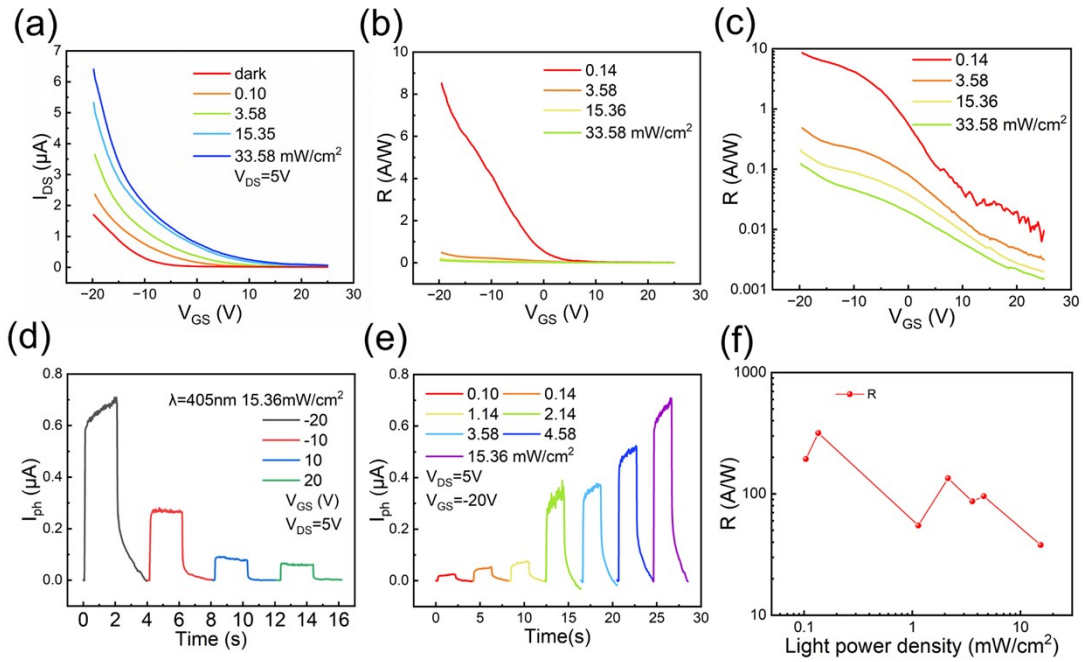

Fig. S2. (a) Transfer characteristic of the WSe<sub>2</sub>/GaN JFET under 405 nm light illumination with different light power intensity at the bias of 5V. (b, c)  $V_{GS}$  dependent responsivity under variable light power intensit in (b) linear scale and (c) logarithmic scale of of y-axis. (d) Time-dependent photocurrent of the device at 405 nm (15.36mW/cm<sup>2</sup>) under different  $V_{GS}$ . (e) Time-dependent photocurrent with increasing light power density at 405 nm ( $V_{ds}=5$  V,  $V_{GS}=-20$  V). f) Light power density dependent responsivity (R) of the device under 405nm.

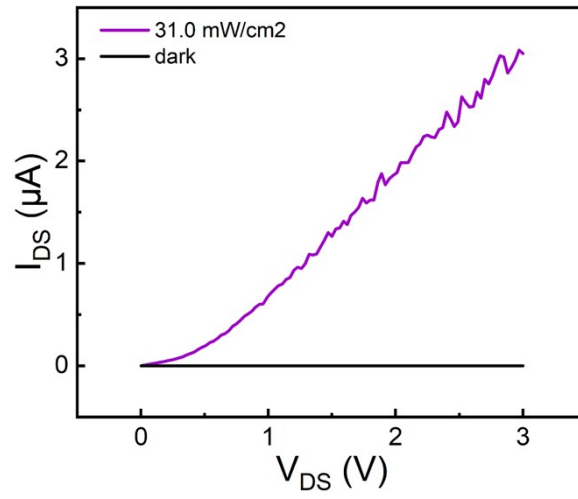

Fig. S3. The I-V characteristic curves of pure GaN under dark and 325 nm light illumination.
